# Supplementary material for: Phenotypic Plasticity During Organofluorine Degradation Revealed by Adaptive Evolution
Source: PubMed Central journal article supplement — Microb Biotechnol. 2024 Dec 26;17(12):e70066. doi: 10.1111/1751-7915.70066 (PMC11670473; doi:10.1111/1751-7915.70066), 2024-12-26
Supplement: MBT2-17-e70066-s001.pdf [file MBT2-17-e70066-s001.pdf]

## **Supporting Information**

### **Phenotypic Plasticity During Organofluorine Degradation Revealed by Adaptive Evolution**

Madeline R. O'Connor, Calvin J. Thoma, Anthony G. Dodge, and Lawrence P. Wackett\*

<sup>1</sup>Department of Biochemistry, Molecular Biology and Biophysics and Biotechnology Institute University of Minnesota, Twin Cities, USA

\*Correspondence: Lawrence Wackett (email: [wacke003@umn.edu](mailto:wacke003@umn.edu))

>*Dechloromonas aromatica* RCB defluorinase (DEF2) gene sequence (codons optimized for expression in *E. coli*)

ATGTTTGACTCATCTTATGTTACTCGTGATGTTGACGTGGGCGCAACGCGTATTCACGTTCCGGGTTCGT  
GAGAATGAGGGGCGCCCTCCACTCTTATTACTTTCATGGTTATCCAGAGACCCATGCAATGTGGCACAAG  
GTCGCTTCATTACTGCAAGATCGCTTTTCCCTCGTGCTCCCTGACCTGCGGGGGTATGGGGACTCGGGG  
ATGCCTGCGTCGCAGGCGGATGCGGGTAACCAGTCGAAGCGCGTTATGGCGCAGGATATGGCAGAGTTG  
ATGACCGCACTGGGGTATCAGCGGTTTCATGTGGCAGCCACGATCGGGGCGCCCGTGTGCTGCATCGT  
CTCTGTTTAGATCATCCAGGTCGTATTCAAACAGCCTGCATCATGGATATCGCGCCGACGGCTACAAC  
TTCGCACTCACTAATCAGGCCTTAGCGACTTCCTATTTTCATTGGTTCTTTTAAATCCAAGCGGCACCA  
TTGCCTGAGAATATGATCGCTGCTGATCCTGCCTCTTGGCTCAAGGGCTGCCTTAGCCGTTGGAGTATG  
GGCAACGAAGAAGCATTTCGATCCTGCCGTTGTGAGTGAGTATGTGCGGTGTTTTTCTAATCCGGAGGCT  
ATTGCTGCTCTTGCATGATTATCGGGCTGCGGCTGGTATTGACCTTCAGCATGACGGCGAAGATGCC  
GAACGTCGCATTAGTTGCCCGCTGTTAGTTCTGTGGGGCAACAAAGGGTTCGTTGGCCGTAACATGAT  
GTCGTTGCTTTGTGGCGCGAAAAAGCCCTTGACGTATCAGGCAAAGGTCTCCCATGTGGGCACCTTTCTC  
CCTGAAGAGCTGCCGAACGATGTAGCTCGGGAACTCGTGCAGTTCATCGCTCGGCACTCTTCATAA

>*Dechloromonas aromatica* RCB defluorinase (DEF2) gene sequence (codons optimized for expression in *P. putida*)

ATGTTTCGACTCGAGCTACGTGACGCGCGACGTGGACGTCCGGTGCAACGCGCATTCACGTTCCGGGTCCGG  
GAAAATGAAGGCCGTCCTCTGTTGCTGCTGCATGGTTATCCCGAAACCCATGCGATGTGGCACAAG  
GTGGCCTCGCTCCTCCAGGATCGGTTTCAGCCTGGTCCCTCCCGACCTCCGTGGCTACGGGGATTCCGGG  
ATGCCAGCTAGCCAAGCAGACGCAGGGAACCAGTCGAAACGGGTCATGGCTCAAGACATGGCTGAGCTC  
ATGACCGCGCTGGGGTATCAACGTTTCCATGTGGCAGCTCATGACCGGGGCGCTCGTGTGTTGCACCGG  
CTGTGCCTCGATCACCTGGTCCGATTCAAACGGCGTGTATTATGGATATTGCCCTACCGCAACGACC  
TTTGCCTCACCAACCAAGCGCTCGCAACCTCGTACTTTTCATTGGTTTTTTCTCATCCAGGCTGCCCTC  
CTGCCGAAAACATGATCGCAGCGGACCCCGCTAGCTGGTTGAAAGGCTGCTTGTCCCGCTGGTTCGATG  
GGTAACGAGGAAGCGTTTCGACCCGGCGGTGGTCTCGGAGTATGTGCGGTGTTTTTCCAACCCTGAGGCG  
ATCCGCTGCTCGTGCATGATTATCGCGCTGCTGCTGGCATCGACCTGCAGCATGACGGTGAAGATGCT  
GAACGTCGATTAGCTGCCCCCTGTTGGTCTTGTGGGGTAACAAGGGCTTCGTGGGTGTAATTACGAT  
GTGGTGGCGCTCTGGCGCGAGAAAGCATTTGGACGTGAGCGGTAAAGGGCTCCCTTGTGGCCACTTTTTG  
CCTGAGGAACTCCCTAACGACGTGGCTCGTGAACGGTTCGAATTTATTGCTCGCCATTCTTCGTGA

**Figure S1**

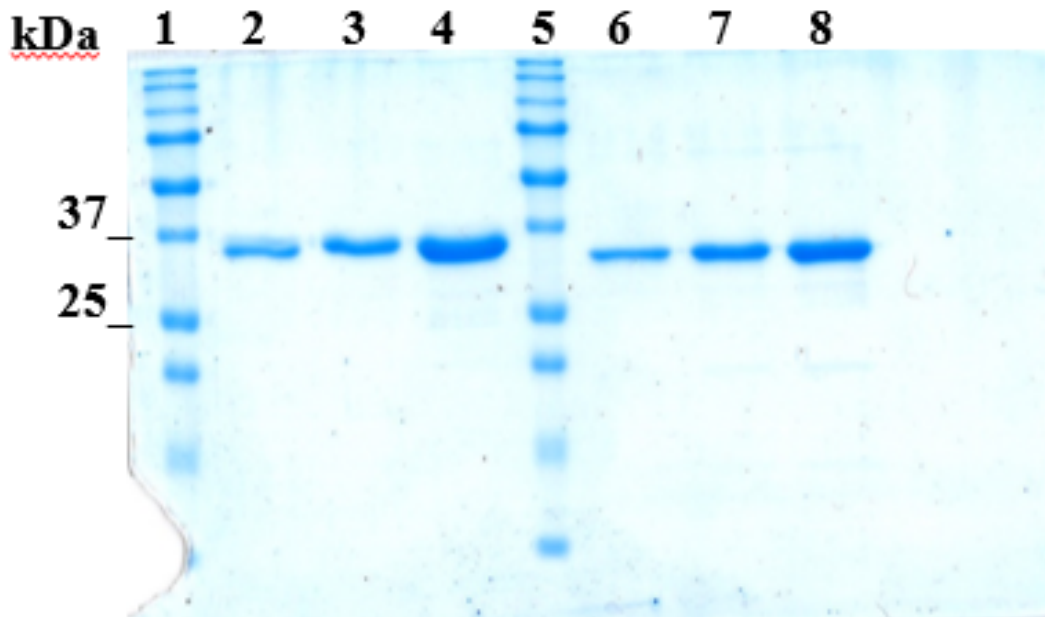

**Figure S2** 12.5% polyacrylamide gel stained with Coomassie blue showing the relative purities of the DEF1 and DEF2 preparations. Lanes 1 and 5 are All Blue Precision Plus Protein molecular weight standards (Bio-Rad). Total protein amounts of 1, 2, 4  $\mu\text{g}$  of each enzyme were loaded into lanes 2, 3, 4 (DEF2) or 6, 7, 8 (DEF1), respectively.

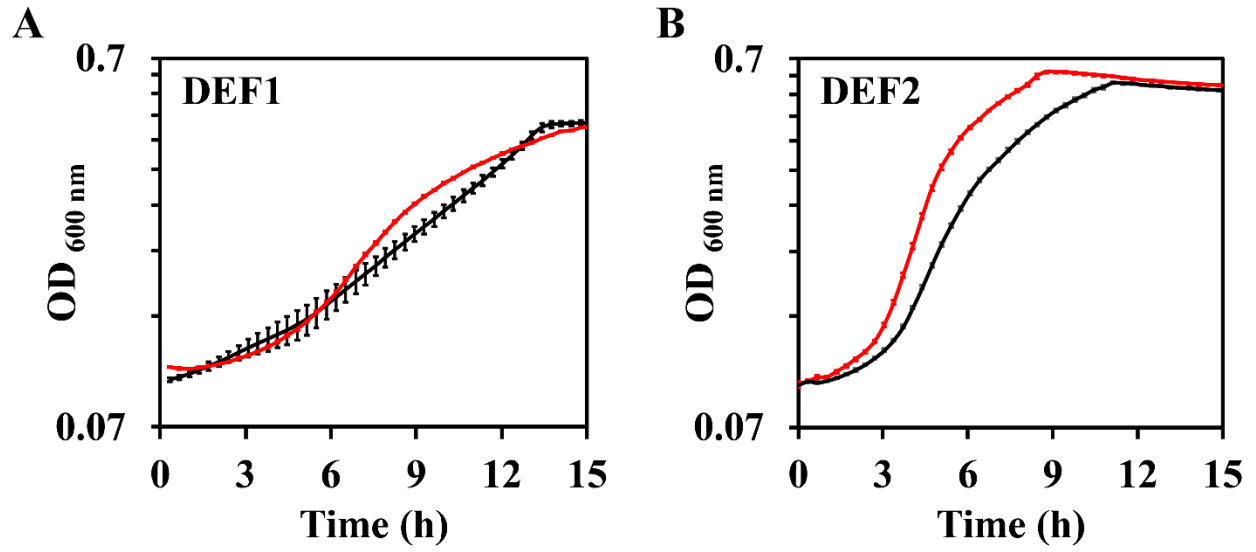

**Figure S3** Growth of post-adapted (red) or pre-adapted (black) recombinant *Pp12663* strains expressing (A)DEF1 or (B)DEF2 on 10 mM mandelic acid as sole carbon and energy in a 96-well plate.

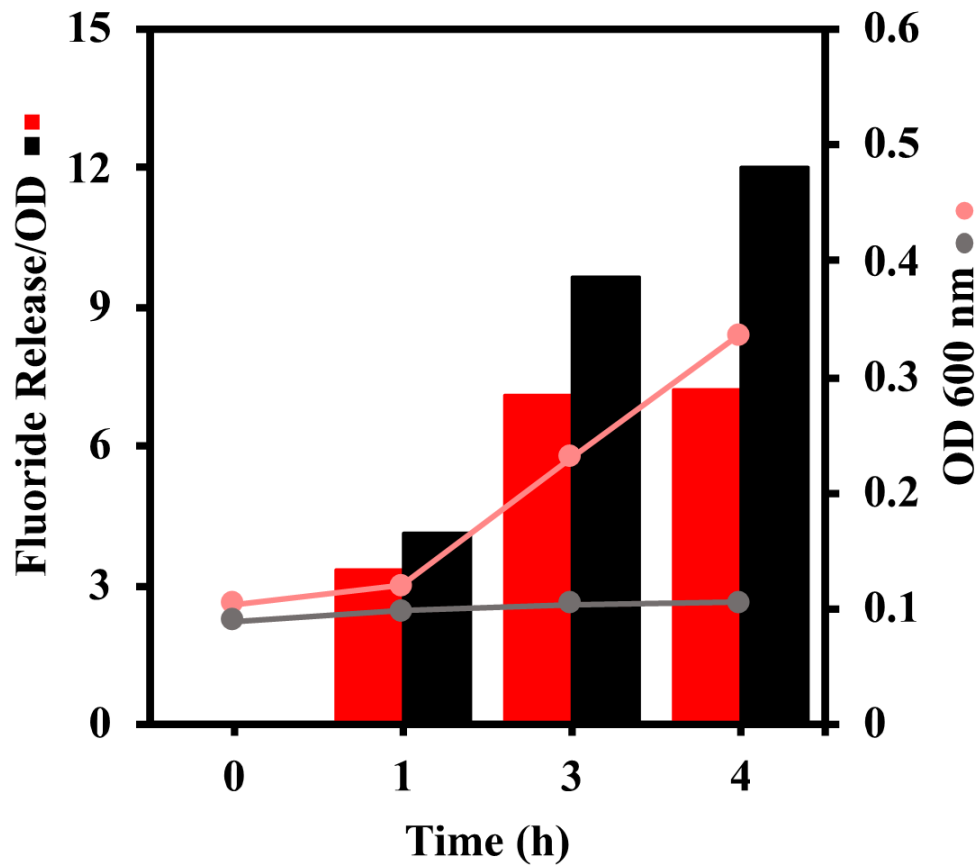

**Figure S4** Initial fluoride release normalized to  $OD_{600}$ , for post-adapted (black columns) or pre-adapted (red columns) DEF1 strains growing on  $\alpha$ -fluorophenylacetic acid.  $OD_{600}$  is also shown for the post-adapted (pink line) or pre-adapted (gray line) strains.

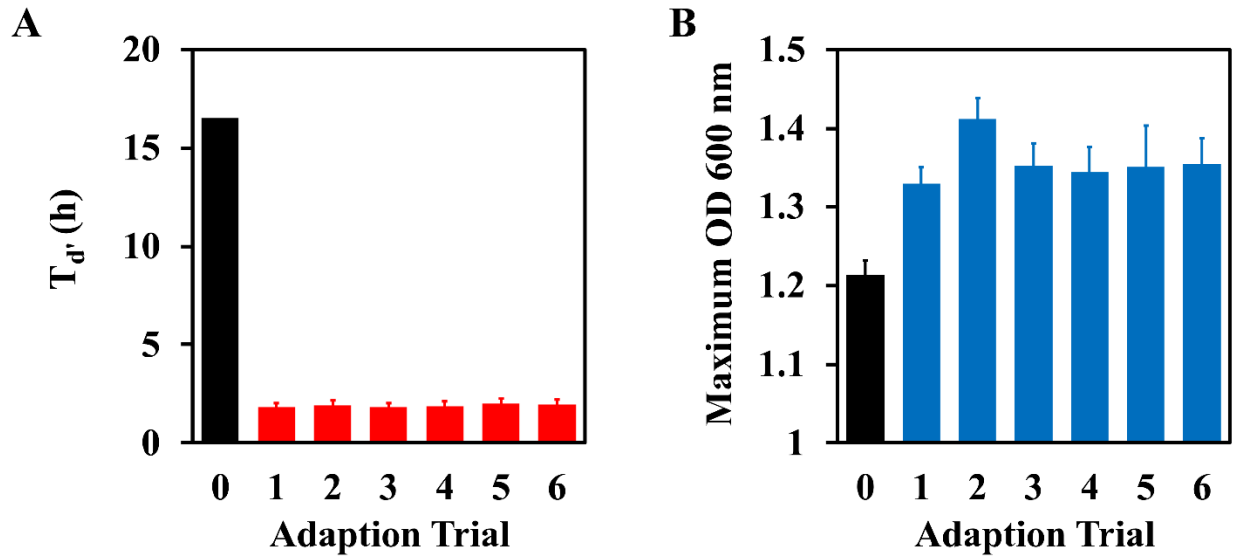

**Figure S5.** (A) First doubling times ( $T_d'$ ) and (B) maximum OD<sub>600</sub> from six independent experiments to adapt *Pp12633* expressing DEF1 to enhanced growth on a-FPhAA. Adaption trial zero refers to the pre-adapted strain in (A) and (B). Error bars represent the average adapted  $T_d'$  and maximum OD<sub>600</sub> for all transfers after maximum adaption was reached (5 transfers to maximum adaption and 6 additional transfers afterwards).

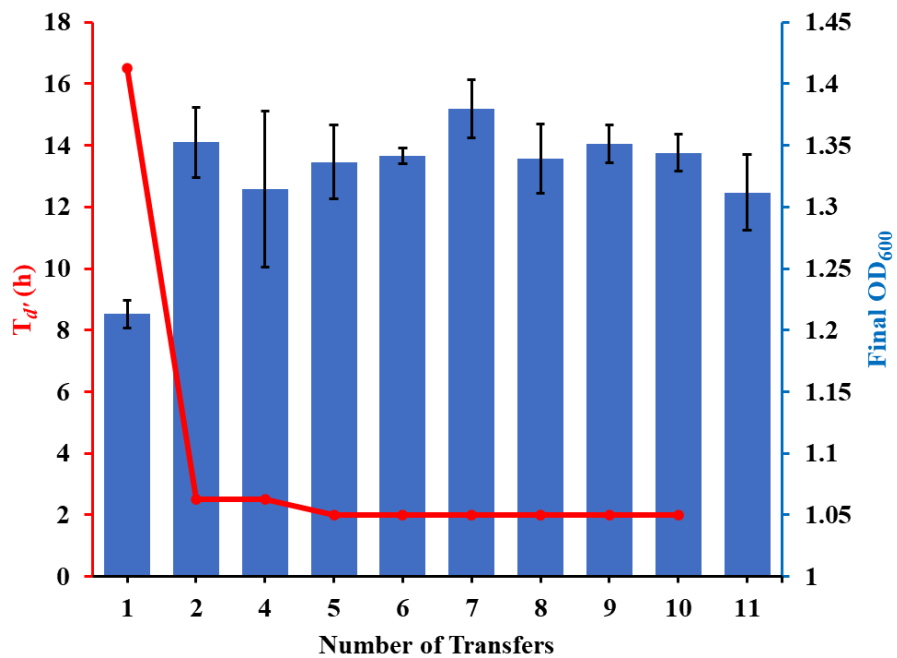

**Figure S6.** First doubling times ( $T_d'$ ) (shown in red) and final OD<sub>600</sub> (shown in blue) across the entire course of evolution from three independent experiments to adapt *Pp12633* expressing DEF1 to enhanced growth on  $\alpha$ -FPhAA. Each generation represents 3-4 generations. Error bars represent the average adapted  $T_d'$  and maximum OD<sub>600</sub> for all transfers.

**Table S1.** Illumina sequencing coverage data for pre- and post-adapted DEF1 and DEF2 strains. Large standard deviations can be partially ascribed to ranges in plasmid copy number, but shouldn't be directly attributed to them. Data was generated from sequence alignment maps using bamtools as described in the methods.

| <b>Defluorinase Gene</b> | <b>Adaption State</b> | <b>Coverage Area</b> | <b>Replicon Length</b> | <b>Bases Sequenced</b> | <b>Average Coverage</b> | <b>Standard Deviation</b> |
|--------------------------|-----------------------|----------------------|------------------------|------------------------|-------------------------|---------------------------|
| DEF1                     | Pre                   | Genome               | 6179370                | 882082477              | 143                     | 40                        |
| DEF1                     | Pre                   | plasmid              | 5448                   | 46269405               | 8493                    | 1455                      |
| DEF1                     | Pre                   | FAcD                 | 936                    | 7510104                | 8024                    | 576                       |
| DEF1                     | Pre                   | plasmid backbone     | 4512                   | 38759301               | 8590                    | 1559                      |
| DEF1                     | Post                  | Genome               | 6179370                | 916298775              | 148                     | 38                        |
| DEF1                     | Post                  | plasmid              | 5448                   | 21221569               | 3895                    | 678                       |
| DEF1                     | Post                  | FAcD                 | 936                    | 3541186                | 3783                    | 331                       |
| DEF1                     | Post                  | plasmid backbone     | 4512                   | 17680383               | 3919                    | 727                       |
| DEF2                     | Pre                   | Genome               | 6179370                | 1122908214             | 182                     | 53                        |
| DEF2                     | Pre                   | plasmid              | 5635                   | 29612000               | 5255                    | 909                       |
| DEF2                     | Pre                   | FAcD                 | 891                    | 4818974                | 5409                    | 407                       |
| DEF2                     | Pre                   | plasmid backbone     | 4744                   | 24793026               | 5226                    | 956                       |
| DEF2                     | Post                  | Genome               | 6179370                | 1089595932             | 176                     | 55                        |
| DEF2                     | Post                  | plasmid              | 5635                   | 12242352               | 2173                    | 1025                      |
| DEF2                     | Post                  | FAcD                 | 891                    | 478790                 | 537                     | 30                        |
| DEF2                     | Post                  | plasmid backbone     | 4744                   | 11763562               | 2480                    | 805                       |



**Table S2** Mutations identified in the chromosomes of post-adapted strains as compared to pre-adapted strains expressing(A) DEF1 or (B) DEF 2. Mutations were identified using *breseq*.

**A**

| Gene             | Protein                                                                               | Position  | Nucleotide change | Mutation   | Mutation Frequency (%) |
|------------------|---------------------------------------------------------------------------------------|-----------|-------------------|------------|------------------------|
| <i>ispE</i>      | 4-(cytidine 5'-diphospho)-2-C-methyl-D-erythritol kinase                              | 918,632   | G→T               | S273I      | 100                    |
| <i>ftsK</i>      | Located proximally to fluoride response genes <i>crcB</i> , <i>rarA</i> , <i>lolA</i> | 4,047,930 | 12 bp deletion    | E761-A764  | 100                    |
| <i>nhaR/sstT</i> | Transcriptional activator NhaR                                                        | 3947289   | C→G               | Intergenic | 34.6                   |
| Hypothetical     | Hypothetical protein/porin                                                            | 2470517   | G→A               | Intergenic | 30.8                   |
| Hypothetical     | Putative MFS transporter                                                              | 3866452   | C→A               | Intergenic | 29.3                   |
| Hypothetical     | Hypothetical protein/porin                                                            | 380837    | C→G               | A63P       | 29                     |
| <i>mfa/clpA</i>  | Translation initiation factor/Clp protease                                            | 4052520   | C→G               | Intergenic | 27                     |

**B**

| Gene                      | Protein                                            | Position | Nucleotide change | Mutation   | Mutation Frequency (%) |
|---------------------------|----------------------------------------------------|----------|-------------------|------------|------------------------|
| <i>mdcA</i>               | Malonate decarboxylase subunit alpha               | 3395334  | C→G               | R14G       | 33.7                   |
| Hypothetical              | fad-dependent oxidoreductase                       | 3173615  | G→C               | V442L      | 32.1                   |
| Hypothetical              | bifunctional diguanylate cyclase/phosphodiesterase | 6050171  | C→A               | I266I      | 32                     |
| Hypothetical/Hypothetical | hypo/ArsR family transcriptional regulator         | 797758   | C→G               | intergenic | 30.4                   |
| Hypothetical/ <i>mgo</i>  | PA4642 family protein/malate dehydrogenase         | 929575   | T→G               | intergenic | 27.4                   |
| Hypothetical              | Lys family transcriptional regulator               | 3398146  | C→G               | P240A      | 26.5                   |
| <i>fliF</i>               | flagellar M-ring protein FliF                      | 4444187  | G→A               | K19K       | 25                     |
| Hypothetical              | 3-keto-5-aminohexanoate cleavage prot              | 404462   | G→C               | G183R      | 24.8                   |
| <i>benR</i>               | benABC operon transcriptional activator BenR       | 3189798  | C→G               | G291G      | 22.9                   |
| Hypothetical              | serine O-acetyltransferase                         | 4867087  | C→G               | G110G      | 22.6                   |

**Table S3.** Steady-state kinetic data for enzymes in the pathway leading from  $\alpha$ -fluorophenylacetic acid to TCA cycle intermediates. Data and references were derived from the BRENDA Enzyme Database (brenda-enzymes.org). Data were taken from enzymes from *Pseudomonas putida* ATCC12633 where available, or from the next closest bacterium, typically another *Pseudomonas putida*. Values of  $k_{cat}$  were captured or derived. Values of  $K_M$  were captured when available.

| Enzyme                                 | Sp act<br>( $\mu\text{mol min}^{-1} \text{mg}^{-1}$ ) | $k_{cat}$ ( $\text{s}^{-1}$ )      | $K_M$ (mM)                  | Reference                 |
|----------------------------------------|-------------------------------------------------------|------------------------------------|-----------------------------|---------------------------|
| DEF1                                   | 14.5                                                  | 8                                  | N/A*                        | This study                |
| DEF2                                   | 32                                                    | 17                                 | N/A                         | This study                |
| Mandelate racemase                     | N/A                                                   | 500 with<br>( <i>R</i> )-mandelate | 0.4                         | Mitra, et al, 1995.       |
| ( <i>S</i> )-Mandelate dehydrogenase   | N/A                                                   | 360                                | 0.12                        | Dewant and Mitra, 2023.   |
| Benzoylformate decarboxylase           | N/A                                                   | 241                                | 0.37                        | Polovnikova, et al, 2003. |
| Benzaldehyde dehydrogenase             | N/A                                                   | 154                                | 0.004                       | Zahniser, et al, 2017.    |
| Benzoate dioxygenase                   | N/A                                                   | 4.4                                | N/A                         | Rivard, et al 2015.       |
| Benzoate 1,2-dihydrodiol dehydrogenase | 0.067                                                 | 0.1                                | N/A                         | Whited, et al, 1986.      |
| Catechol 1,2 dioxygenase               | N/A                                                   | 50                                 | 0.002                       | Nakai, et al, 1980.       |
| Muconate cycloisomerase                | N/A                                                   | 13.9                               | 0.42                        | Ngai, et al, 1983.        |
| Muconolactone <i>delta</i> -isomerase  | 860                                                   | 143                                | 0.64                        | Matsumura, et al, 2006.   |
| 3-Oxoadipate enol-lactonase            | 717                                                   | 394                                | 0.012                       | Ornston, 1970.            |
| 3-Oxoadipate-CoA transferase           | 21.3                                                  | 8.6                                | N/A                         | Yeh, et al. 1981.         |
| 3-Oxoadipyl-CoA thiolase               | N/A                                                   | 7.8                                | 0.15 for<br>3-oxoadipyl CoA | Kaschabek, et al, 2002    |

\*N/A means not determined
